# Supplementary material for: Geographical distribution and social determinants of Tobacco 21 policy adoption and retail inspections in the United States, 2015–2019
Source: PubMed Central journal article supplement (PMC8445336; doi:10.18332/tid/140148), 2021-09-16
Supplement: TID-19-71-s2.pdf [file TID-19-71-s2.pdf]

## Supplemental File 1: Design of Aims 2 and 3

Experimental (8 x 8 balanced lattice) design in which each participant is randomized to one of nine repetitions (depicted as columns here) and completes a discrete choice experiment while viewing eight stimuli (packs) within each of eight blocks presented in random order. Thus, each participant was asked to complete eight discrete choice tasks.

See Cochran and Cox Plan 10.5 for the full design.<sup>1</sup>

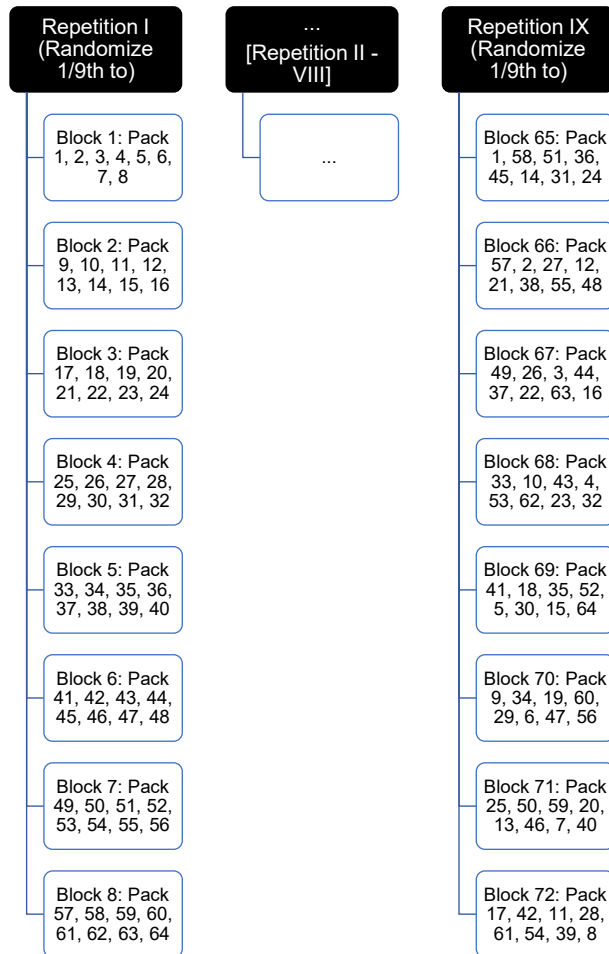

1. Cochran WD, Cox GM. *Experimental designs*. 2 ed. New York: John Wiley & Sons; 1992.

**Supplemental Table 1.** Pairwise comparisons for Study 1

| <b>Shape Comparisons</b>           | <b>Diff</b> | <b>SE(diff)</b> | <b>Z-value</b> | <b>p-value</b> |
|------------------------------------|-------------|-----------------|----------------|----------------|
| <b>1 vs 2</b>                      | -1.1319     | 0.114657        | -9.87204       | <0.001         |
| <b>1 vs 3</b>                      | -1.1921     | 0.11705         | -10.1846       | <0.001         |
| <b>1 vs 4</b>                      | -1.3392     | 0.11924         | -11.2311       | <0.001         |
| 2 vs 3                             | -0.0602     | 0.093385        | -0.64464       | 0.52           |
| <b>2 vs 4</b>                      | -0.2073     | 0.096117        | -2.15675       | 0.03           |
| 3 vs 4                             | -0.1471     | 0.098959        | -1.48648       | 0.14           |
| <b>Color Saturation Comparison</b> | <b>Diff</b> | <b>SE(diff)</b> | <b>Z-value</b> | <b>p-value</b> |
| <b>1 vs 2</b>                      | -0.759      | 0.095936        | -7.9115        | <0.001         |
| <b>1 vs 3</b>                      | -0.7991     | 0.097351        | -8.20841       | <0.001         |
| <b>1 vs 4</b>                      | -0.73       | 0.103161        | -7.07634       | <0.001         |
| 2 vs 3                             | 0.0291      | 0.054456        | 0.534374       | 0.59           |
| 2 vs 4                             | -0.011      | 0.054041        | -0.20355       | 0.84           |
| 3 vs 4                             | -0.0401     | 0.053035        | -0.75611       | 0.45           |
| <b>Logo Size Comparison</b>        | <b>Diff</b> | <b>SE(diff)</b> | <b>Z-value</b> | <b>p-value</b> |
| 1 vs 2                             | 0.0542      | 0.068473        | 0.791557       | 0.43           |
| <b>1 vs 3</b>                      | -0.228      | 0.06618         | -3.44515       | <0.001         |
| 1 vs 4                             | -0.1126     | 0.069164        | -1.62801       | 0.10           |
| 2 vs 3                             | -0.2822     | 0.06425         | 0.534374       | 0.59           |
| 2 vs 4                             | -0.1668     | 0.06732         | -0.20355       | 0.84           |
| 3 vs 4                             | -0.0401     | 0.064987        | -0.75611       | 0.45           |

**Supplemental Table 2.** Pairwise comparisons for Study 2's Appeal Task

| <b>Design Comparison</b> | <b>Diff</b> | <b>SE(diff)</b> | <b>Z-value</b> | <b>p-value</b> |
|--------------------------|-------------|-----------------|----------------|----------------|
| 1 vs 2                   | 0.1040      | 0.09631         | 1.079851       | 0.28           |
| <b>1 vs 3</b>            | 0.3669      | 0.103809        | 3.534385       | <0.01          |
| <b>1 vs 4</b>            | 0.9000      | 0.116715        | 7.71106        | <0.01          |
| 2 vs 3                   | -0.0602     | 0.054874        | -1.09705       | 0.27           |
| <b>2 vs 4</b>            | -0.2073     | 0.053835        | -3.85063       | <0.01          |
| <b>3 vs 4</b>            | -0.1471     | 0.053256        | -2.76215       | 0.01           |
| <b>Color Comparison</b>  | <b>Diff</b> | <b>SE(diff)</b> | <b>Z-value</b> | <b>p-value</b> |
| <b>1 vs 2</b>            | 1.1636      | 0.113066        | 10.2913        | <0.01          |
| <b>1 vs 3</b>            | 1.0136      | 0.108706        | 9.324246       | <0.01          |
| <b>1 vs 4</b>            | 0.7702      | 0.104479        | 7.371824       | <0.01          |
| <b>1 vs 5</b>            | 0.5645      | 0.109933        | 5.134968       | <0.01          |
| <b>1 vs 6</b>            | 0.8826      | 0.108706        | 8.119159       | <0.01          |
| <b>1 vs 7</b>            | 0.6542      | 0.109864        | 5.954637       | <0.01          |
| <b>1 vs 8</b>            | 0.6689      | 0.08            | 8.36125        | <0.01          |
| <b>2 vs 3</b>            | 0.7111      | 0.086964        | 8.176907       | <0.01          |
| <b>2 vs 4</b>            | 0.4677      | 0.086964        | 5.378062       | <0.01          |
| <b>2 vs 5</b>            | 0.2620      | 0.08            | 3.275          | <0.01          |
| <b>2 vs 6</b>            | 0.5801      | 0.08            | 7.25125        | <0.01          |
| <b>2 vs 7</b>            | 0.3517      | 0.08            | 4.39625        | <0.01          |
| <b>2 vs 8</b>            | 0.3664      | 0.08            | 4.58           | <0.01          |
| <b>3 vs 4</b>            | -0.3934     | 0.104402        | -3.76811       | <0.01          |
| <b>3 vs 5</b>            | -0.5991     | 0.10986         | -5.45332       | <0.01          |
| <b>3 vs 6</b>            | -0.281      | 0.108632        | -2.58671       | 0.01           |
| <b>3 vs 7</b>            | -0.5094     | 0.109791        | -4.63972       | <0.01          |
| <b>3 vs 8</b>            | -0.4947     | 0.0799          | -6.19149       | <0.01          |
| <b>4 vs 5</b>            | -0.4491     | 0.105367        | -4.26226       | <0.01          |
| 4 vs 6                   | -0.1310     | 0.104086        | -1.25857       | 0.21           |
| <b>4 vs 7</b>            | -0.3594     | 0.105295        | -3.41327       | <0.01          |
| <b>4 vs 8</b>            | -0.3447     | 0.0736          | -4.68342       | <0.01          |
| 5 vs 6                   | 0.1124      | 0.099663        | 1.127796       | 0.26           |
| 5 vs 7                   | -0.1160     | 0.100925        | -1.14936       | 0.25           |
| 5 vs 8                   | -0.1013     | 0.0672          | -1.50744       | 0.13           |
| 6 vs 7                   | 0.0897      | 0.106561        | 0.841771       | 0.40           |
| 6 vs 8                   | 0.1044      | 0.0754          | 1.384615       | 0.17           |
| <b>7 vs 8</b>            | -0.2137     | 0.082752        | -2.5824        | 0.01           |

**Supplemental Table 3.** Pairwise comparisons for Study 2's Least Harm Task

| <b>Design Comparison</b> | <b>Diff</b> | <b>SE(diff)</b> | <b>Z-value</b> | <b>p-value</b> |
|--------------------------|-------------|-----------------|----------------|----------------|
| 1 vs 2                   | -0.1051     | 0.113208        | -0.92838       | 0.35           |
| <b>1 vs 3</b>            | -1.0699     | 0.108220        | -9.88631       | <0.01          |
| 1 vs 4                   | 0.1349      | 0.125067        | 1.078623       | 0.28           |
| 2 vs 3                   | -0.0602     | 0.054874        | -1.09705       | 0.27           |
| <b>2 vs 4</b>            | -0.2073     | 0.053835        | -3.85063       | <0.01          |
| <b>3 vs 4</b>            | -0.1471     | 0.053256        | -2.76215       | <0.01          |
| <b>Color Comparison</b>  | <b>Diff</b> | <b>SE(diff)</b> | <b>Z-value</b> | <b>p-value</b> |
| <b>1 vs 2</b>            | 0.5054      | 0.103726        | 4.872451       | <0.01          |
| <b>1 vs 3</b>            | 0.7694      | 0.100364        | 7.666131       | <0.01          |
| <b>1 vs 4</b>            | 0.8964      | 0.095390        | 9.397213       | <0.00          |
| <b>1 vs 5</b>            | 0.9375      | 0.099702        | 9.403039       | <0.01          |
| <b>1 vs 6</b>            | 0.5536      | 0.092825        | 5.963938       | <0.01          |
| <b>1 vs 7</b>            | 0.7278      | 0.093994        | 7.743057       | <0.01          |
| <b>1 vs 8</b>            | 0.4141      | 0.100069        | 4.138146       | <0.01          |
| <b>2 vs 3</b>            | 0.2640      | 0.06780         | 3.893805       | <0.01          |
| <b>2 vs 4</b>            | 0.3910      | 0.076671        | 5.099695       | <0.01          |
| <b>2 vs 5</b>            | 0.4321      | 0.076671        | 5.635750       | <0.01          |
| 2 vs 6                   | 0.0482      | 0.06780         | 0.710914       | 0.48           |
| <b>2 vs 7</b>            | 0.2224      | 0.06780         | 3.280236       | <0.01          |
| 2 vs 8                   | -0.0913     | 0.06780         | -1.346610      | 0.18           |
| 3 vs 4                   | 0.1270      | 0.099892        | 1.271373       | 0.20           |
| 3 vs 5                   | 0.1681      | 0.104017        | 1.616076       | 0.11           |
| <b>3 vs 6</b>            | -0.2158     | 0.097445        | -2.214580      | 0.03           |
| 3 vs 7                   | -0.0416     | 0.098560        | -0.422080      | 0.67           |
| <b>3 vs 8</b>            | -0.3553     | 0.104369        | -3.40426       | <0.01          |
| 4 vs 5                   | 0.0411      | 0.099227        | 0.414201       | 0.68           |
| <b>4 vs 6</b>            | -0.3428     | 0.092315        | -3.71339       | <0.01          |
| 4 vs 7                   | -0.1686     | 0.093490        | -1.80340       | 0.07           |
| <b>4 vs 8</b>            | -0.4823     | 0.099596        | -4.84256       | <0.01          |
| <b>5 vs 6</b>            | -0.3839     | 0.096763        | -3.96741       | <0.01          |
| <b>5 vs 7</b>            | -0.2097     | 0.097886        | -2.14229       | 0.03           |
| <b>5 vs 8</b>            | -0.5234     | 0.103733        | -5.04564       | <0.01          |
| 6 vs 7                   | 0.1742      | 0.090871        | 1.91700        | 0.06           |
| 6 vs 8                   | -0.1395     | 0.097142        | -1.43605       | 0.15           |
| <b>7 vs 8</b>            | -0.3137     | 0.072809        | -4.30851       | <0.01          |

**Supplemental Table 4.** Pairwise comparisons for Study 2's Personal Style Task

| <b>Design Comparison</b> | <b>Diff</b> | <b>SE(diff)</b> | <b>Z-value</b> | <b>p-value</b> |
|--------------------------|-------------|-----------------|----------------|----------------|
| 1 vs 2                   | -0.0353     | 0.098502        | -0.35837       | 0.72           |
| <b>1 vs 3</b>            | 0.3062      | 0.106142        | 2.884818       | <0.01          |
| <b>1 vs 4</b>            | 0.8674      | 0.119112        | 7.282214       | <0.01          |
| 2 vs 3                   | -0.0602     | 0.054874        | -1.09705       | 0.27           |
| <b>2 vs 4</b>            | -0.2073     | 0.053835        | -3.85063       | <0.01          |
| <b>3 vs 4</b>            | -0.1471     | 0.053256        | -2.76215       | 0.01           |
| <b>Color Comparison</b>  | <b>Diff</b> | <b>SE(diff)</b> | <b>Z-value</b> | <b>p-value</b> |
| <b>1 vs 2</b>            | 0.5669      | 0.117631        | 4.819293       | <0.01          |
| <b>1 vs 3</b>            | 1.3016      | 0.112359        | 11.58427       | <0.01          |
| <b>1 vs 4</b>            | 1.0202      | 0.108747        | 9.381416       | <0.01          |
| <b>1 vs 5</b>            | 0.8465      | 0.10371         | 8.162166       | <0.01          |
| <b>1 vs 6</b>            | 0.6593      | 0.10827         | 6.089378       | <0.01          |
| <b>1 vs 7</b>            | 0.7974      | 0.11019         | 7.23656        | <0.01          |
| <b>1 vs 8</b>            | 0.7682      | 0.110885        | 6.927882       | <0.01          |
| <b>2 vs 3</b>            | 0.7347      | 0.0795          | 9.241509       | <0.01          |
| <b>2 vs 4</b>            | 0.4533      | 0.086703        | 5.228193       | <0.01          |
| <b>2 vs 5</b>            | 0.2796      | 0.086703        | 3.224802       | <0.01          |
| 2 vs 6                   | 0.0924      | 0.0795          | 1.162264       | 0.25           |
| <b>2 vs 7</b>            | 0.2305      | 0.0795          | 2.899371       | <0.01          |
| <b>2 vs 8</b>            | 0.2013      | 0.0795          | 2.532075       | 0.01           |
| <b>3 vs 4</b>            | -0.2814     | 0.108674        | -2.5894        | 0.01           |
| <b>3 vs 5</b>            | -0.4551     | 0.103634        | -4.39143       | <0.01          |
| <b>3 vs 6</b>            | -0.6423     | 0.108197        | -5.93639       | <0.01          |
| <b>3 vs 7</b>            | -0.5042     | 0.110118        | -4.57871       | <0.01          |
| <b>3 vs 8</b>            | -0.5334     | 0.110814        | -4.81349       | <0.01          |
| 4 vs 5                   | -0.1737     | 0.099706        | -1.74213       | 0.08           |
| <b>4 vs 6</b>            | -0.3609     | 0.104441        | -3.45554       | <0.01          |
| <b>4 vs 7</b>            | -0.2228     | 0.10643         | -2.0934        | 0.04           |
| <b>4 vs 8</b>            | -0.2520     | 0.107149        | -2.35186       | 0.02           |
| 5 vs 6                   | -0.1872     | 0.099186        | -1.88737       | 0.06           |
| 5 vs 7                   | -0.0491     | 0.101278        | -0.4848        | 0.63           |
| 5 vs 8                   | -0.0783     | 0.102034        | -0.76739       | 0.44           |
| 6 vs 7                   | 0.1381      | 0.105943        | 1.30353        | 0.19           |
| 6 vs 8                   | 0.1089      | 0.106666        | 1.020948       | 0.31           |
| 7 vs 8                   | -0.0292     | 0.081237        | -0.35944       | 0.72           |
